# Supplementary material for: Excess ribosomal protein production unbalances translation in a model of Fragile X Syndrome
Source: PubMed Central journal article supplement (PMC9187743; doi:10.1038/s41467-022-30979-0), 2022-06-10
Supplement: 41467_2022_30979_MOESM2_ESM.pdf [file 41467_2022_30979_MOESM2_ESM.pdf]

## Description of Additional Supplementary Files

**Supplementary Data 1.** Contains raw data from the *Fmr1*<sup>-/-</sup> proteomics analysis

**Supplementary Data 2.** Contains GSEA analyses of TRAP-seq and proteomics datasets

**Supplementary Data 3.** Contains raw data from *Fmr1*<sup>-/-</sup> SNAP-TRAP-seq

**Supplementary Data 4.** Contains raw data from DHPG TRAP-seq

**Supplementary Data 5.** Contains GSEA analyses of DHPG TRAP-seq

**Supplementary Data 6.** Lists targets upregulated in both WT DHPG TRAP-seq and in *Fmr1*<sup>-/-</sup> CA1-TRAP-seq

**Supplementary Data 7.** Lists RPs upregulated in both WT DHPG TRAP-seq and in *Fmr1*<sup>-/-</sup> CA1-TRAP-seq

**Supplementary Data 8.** Contains GSEA analyses of transcript lengths in TRAP-seq

**Supplementary Data 9.** Lists targets downregulated in both *Fmr1*<sup>-/-</sup> proteomics and *Fmr1*<sup>-/-</sup> SNAP-TRAP-seq datasets

**Supplementary Data 10.** Lists targets downregulated in both *Fmr1*<sup>-/-</sup> proteomics and *Fmr1*<sup>-/-</sup> CA1-TRAP-seq datasets

**Supplementary Data 11.** Contains raw data from DHPG transcriptome

**Supplementary Data 12.** Lists targets downregulated in both WT DHPG TRAP-seq and in *Fmr1*<sup>-/-</sup> CA1-TRAP-seq

**Supplementary Data 13.** Contains raw data from CX-5461 DHPG TRAP-seq
